# Supplementary material for: The Cystic Fibrosis Transmembrane Conductance Regulator (CFTR): THREE-DIMENSIONAL STRUCTURE AND LOCALIZATION OF A CHANNEL GATE
Source: PubMed Central journal article supplement — J Biol Chem. 2011 Sep 19;286(49):42647–54. doi: 10.1074/jbc.M111.292268 (PMC3234965; doi:10.1074/jbc.m111.292268), 2011-09-19
Supplement: supp_M111.292268_jbc.M111.292268-2.pdf [file supp_M111.292268_jbc.M111.292268-2.pdf]

### Supplementary Figure 3.

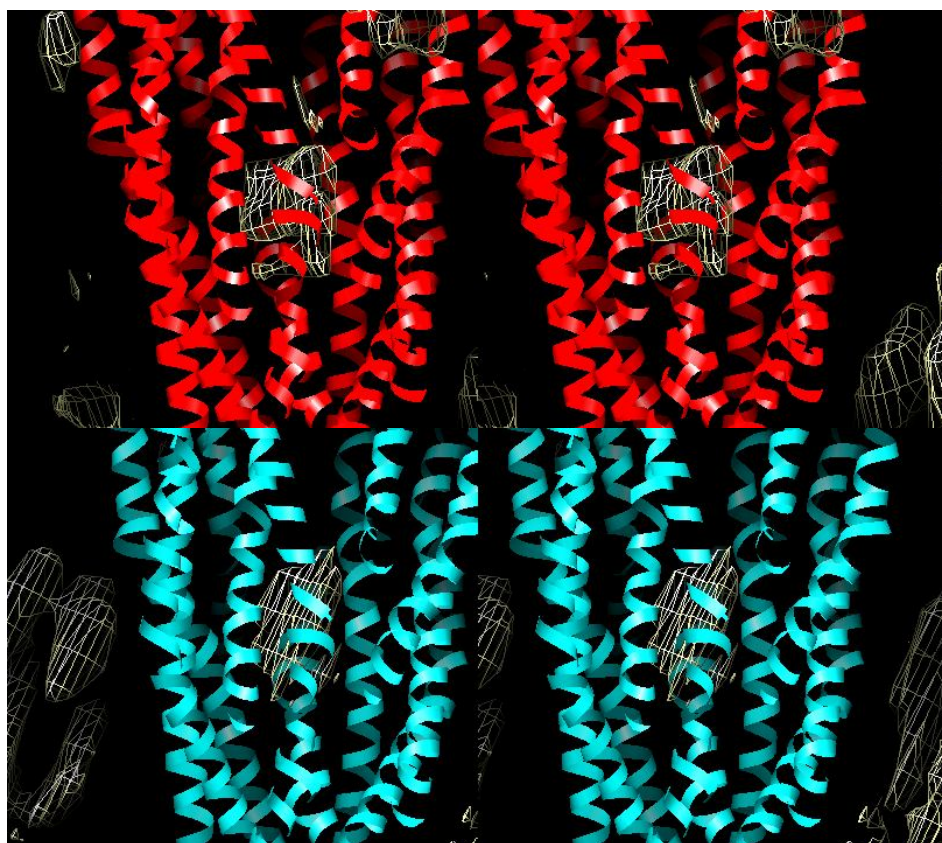

Stereo views illustrating additional density (grey mesh) at the centre of the predicted transmembrane regions of the upper (top panel) and lower (bottom panel) CFTR molecules in the unit cell (see Fig. 4, main text). Viewing direction is perpendicular to the long molecular axis. The two fitted Sav1866 models are shown by the red and blue ribbon traces.

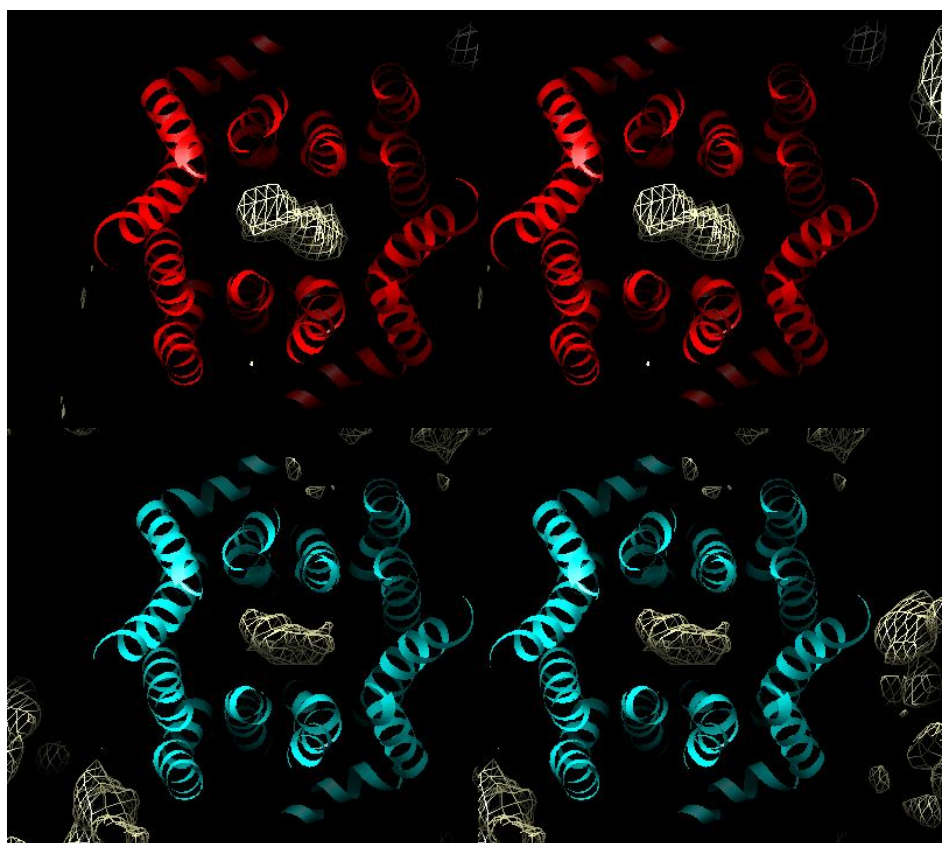

Stereo views of the lozenge-shaped density (grey mesh) at the centre of the predicted transmembrane regions of the upper (top panel) and lower (bottom panel) CFTR molecules in the unit cell (see Fig. 4, main text). Viewing direction is from the extracellular side of the molecule and along the long molecular axis.

### Supplementary Figure 3 (contd).

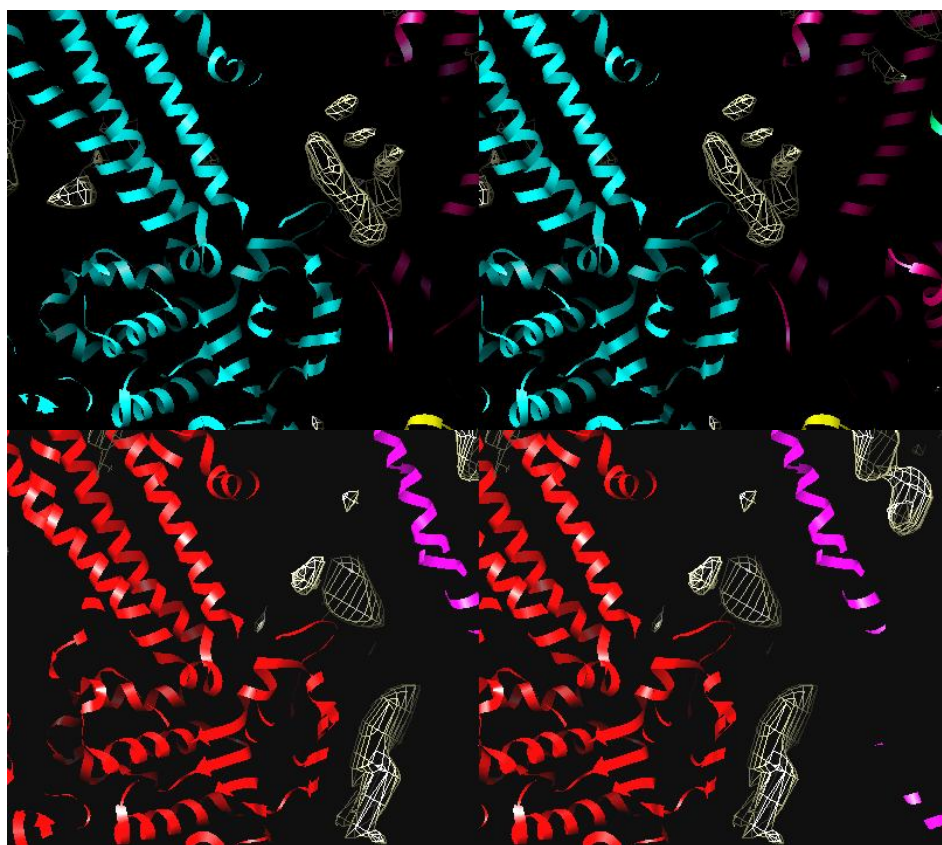

Stereo views of the additional density (grey mesh) close to interface between the ICLs and the NBDs in the upper (top panel) and lower (bottom panel) CFTR molecules (see Fig. 4, main text). Viewing direction is perpendicular to the long molecular axis.

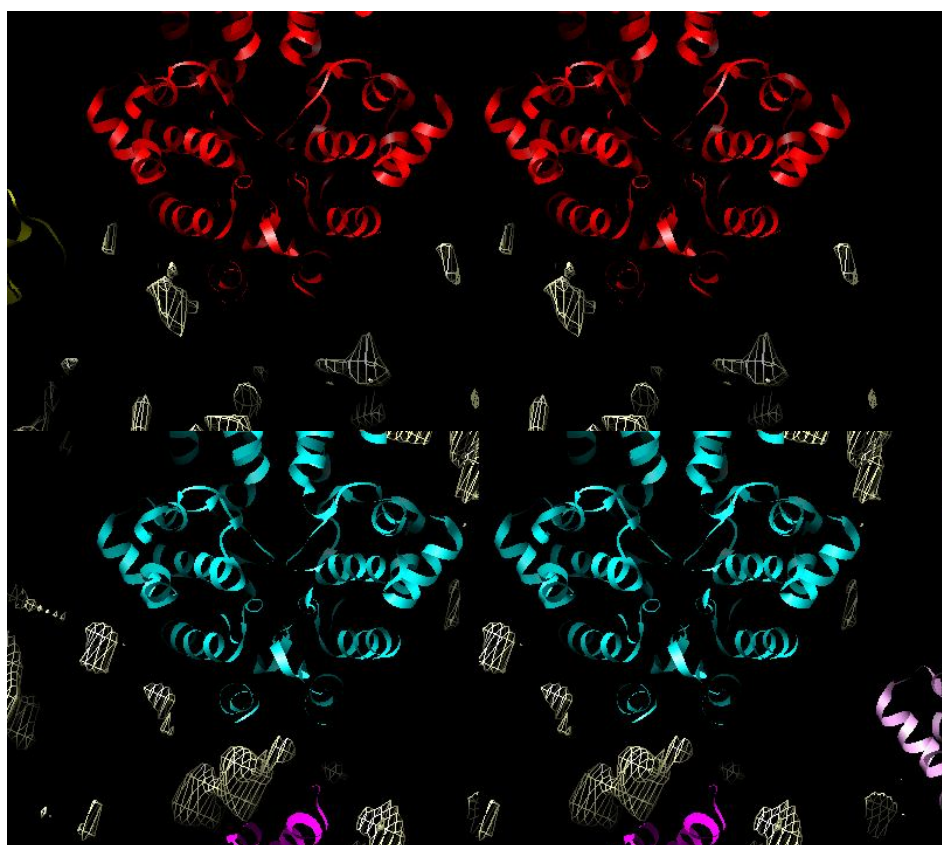

Stereo views of the additional density (grey mesh) close to the C-termini of the NBDs in the upper (top panel) and lower (bottom panel) CFTR molecules (see Fig. 4, main text). Viewing direction is perpendicular to the long molecular axis.
